# Supplementary material for: Phasor-Based Multi-Harmonic Unmixing for In-Vivo Hyperspectral Imaging
Source: bioRxiv or medRxiv preprint supplement (doi:10.1101/2022.03.31.486485), 2022-10-10
Supplement: Supplementary file [file media-1.pdf]

# PHASOR-BASED MULTI-HARMONIC UNMIXING FOR IN-VIVO HYPERSPPECTRAL IMAGING

Alexander Vallmitjana<sup>1</sup>, Paola Lepanto<sup>2</sup>, Florencia Irigoin<sup>2,3,4</sup>, Leonel Malacrida<sup>4,5,\*</sup>

<sup>1</sup> Department of Biomedical Engineering, University of California, Irvine, Irvine, CA, USA,

<sup>2</sup> Human Molecular Genetics Lab, Institut Pasteur de Montevideo, Montevideo, Mataojo 2020, CP11400, Uruguay.

<sup>3</sup> Departamento de Histología y Embriología, Facultad de Medicina, Universidad de la República, Montevideo, Uruguay.

<sup>4</sup> Advanced Bioimaging Unit, Institut Pasteur of Montevideo and Universidad de la República, Montevideo, Uruguay.

<sup>5</sup> Departamento de Fisiopatología, Hospital de Clínicas, Facultad de Medicina, Universidad de la República, Montevideo, Uruguay.

\* Corresponding Author.

E-mail: lmalacrida@hc.edu.uy/lmalacrida@pasteur.edu.uy

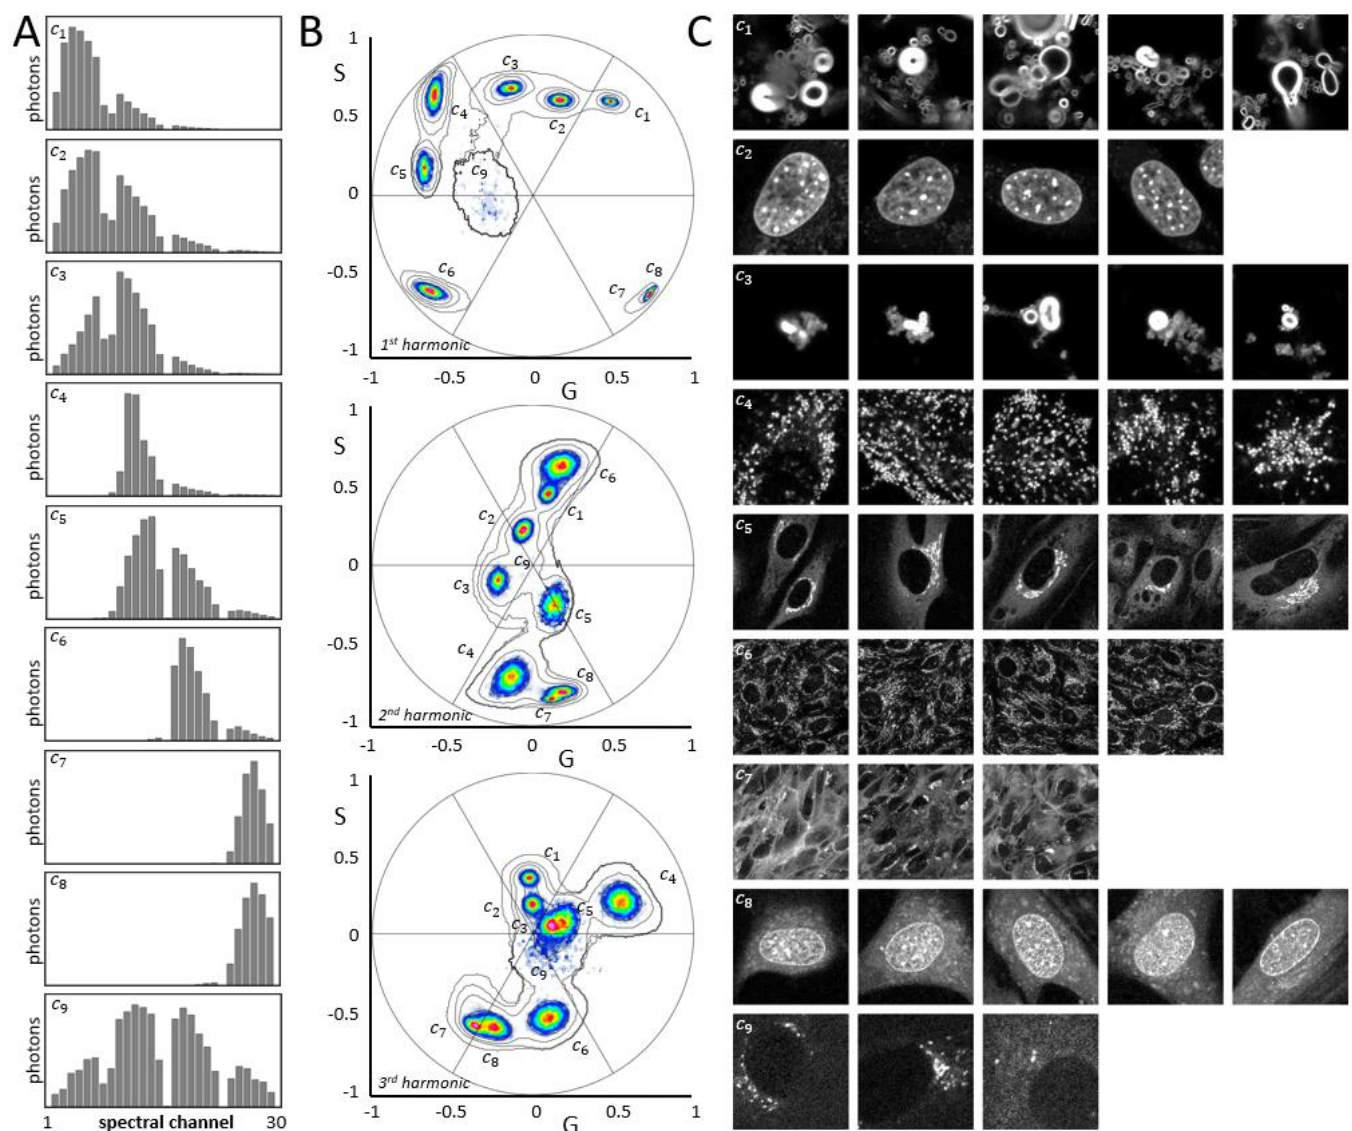

**Supplementary Figure 1. Empirically measuring the phasor positions of the pure components.** (C<sub>1</sub>) Non-relaxed LAURDAN, (C<sub>2</sub>) Hoechst, (C<sub>3</sub>) Relaxed LAURDAN, (C<sub>4</sub>) LysoTracker Green, (C<sub>5</sub>) Cytopainter Golgi, (C<sub>6</sub>) Mitotracker Orange, (C<sub>7</sub>) CellMask, (C<sub>8</sub>) NucRed, and (C<sub>9</sub>) unlabeled cells (autofluorescence)). A) Average spectral emission for all pixels with more than 50 photon counts in each of the images (10<sup>3</sup> pixels per component, 10<sup>7</sup> photons per distribution). The gaps in the spectral distributions correspond to the emission dichroic band notches for the excitation laser lines. B) Spectral phasor distributions for the pixels of each set of images. C) Intensity image samples of each of the component sets.

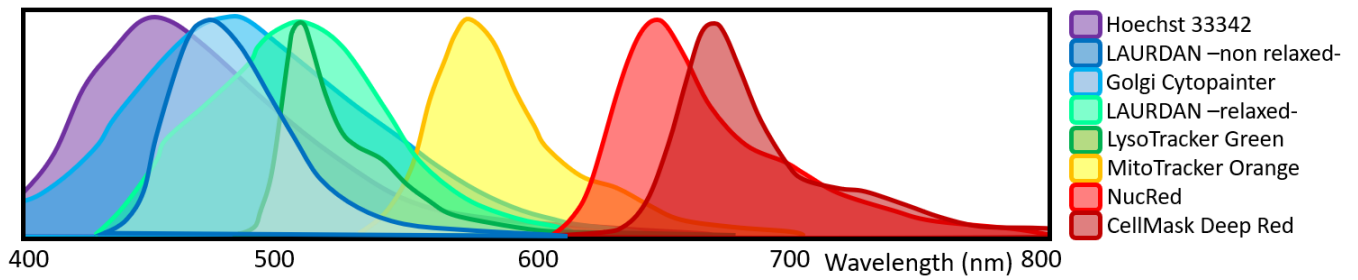

**Supplementary Figure 2. Theoretical emission spectra of the pure components.** Spectra were obtained from the respective vendors, with the exception of the two LAURDAN emissions which were obtained from [1].

- [1] Malacrida L, Gratton E and Jameson D M 2015 Model-free methods to study membrane environmental probes: A comparison of the spectral phasor and generalized polarization approaches *Methods Appl. Fluoresc.* **3**
